# Supplementary material for: Temperature-controlled repeatable scrambling and induced-sorting of building blocks between cubic assemblies
Source: PubMed Central journal article supplement (PMC6441092; doi:10.1038/s41467-019-09495-1), 2019-03-29
Supplement: 41467_2019_9495_MOESM1_ESM.pdf [file 41467_2019_9495_MOESM1_ESM.pdf]

## Supplementary Information

Temperature-controlled repeatable scrambling and induced-sorting of building blocks between cubic assemblies

Zhan *et al.*

## Supplementary Methods

### Synthesis of partially deuterated GSAs

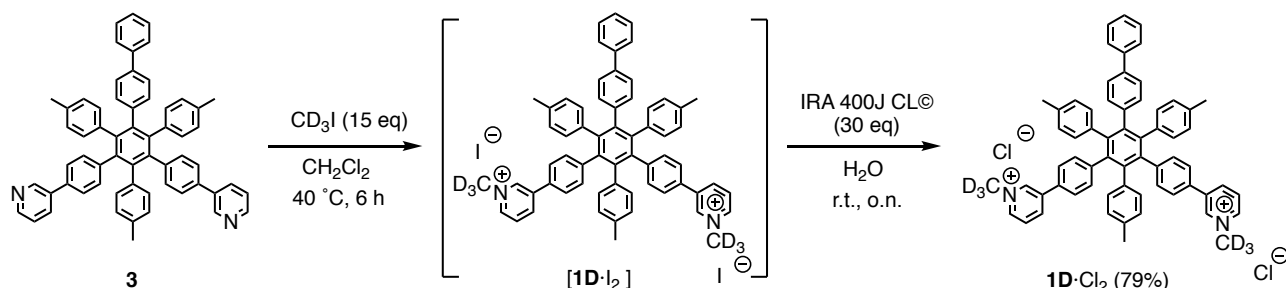

#### 1D-Cl<sub>2</sub> GSA

$\text{CD}_3\text{I}$  (55 mg, 0.38 mmol) was added to a solution of compound **3** (20 mg, 0.025 mmol) in  $\text{CH}_2\text{Cl}_2$  (1 mL). The reaction mixture was stirred at  $40^\circ\text{C}$  for overnight under dark. Then the solvent was removed in vacuo. The crude material was washed with *n*-hexane and  $\text{CH}_2\text{Cl}_2$  two times to obtain **1D-I<sub>2</sub>** (23 mg, 0.021 mmol) as a yellow solid. A suspension of **1D-I<sub>2</sub>** (23 mg, 0.021 mmol) and IRA 400J CL© (302 mg, 0.60 mmol) in water (2 mL) were stirred for overnight. Then the solution was filtered and the filtrate was concentrated in vacuo to obtain **1D-Cl<sub>2</sub>** (17 mg, 0.019 mmol) as a pale yellow solid in 79% yield in two steps.  $^1\text{H}$  NMR (500 MHz,  $\text{CD}_3\text{OD}$ ,  $25^\circ\text{C}$ ):  $\delta$  9.12 (s, 2H), 8.74 (d,  $J = 6.0$  Hz, 2H), 8.66 (d,  $J = 8.2$  Hz, 2H), 8.00 (dd,  $J = 8.7, 6.1$  Hz, 2H), 7.46–7.36 (m, 6H), 7.32 (t,  $J = 7.6$  Hz, 2H), 7.23 (t,  $J = 7.3$  Hz, 1H), 7.19–7.12 (m, 6H), 6.93 (d,  $J = 8.2$  Hz, 2H), 6.88–6.80 (m, 6H), 6.73–6.65 (m, 6H), 2.04 (s, 6H), 2.01 (s, 3H);  $^{13}\text{C}$  NMR (125 MHz,  $\text{CD}_3\text{OD}$ , 298 K):  $\delta$  144.97, 144.58, 144.22, 143.30, 142.21, 142.10, 141.96, 141.79, 141.45, 140.90, 139.19, 138.67, 138.63, 136.32, 134.09, 133.02, 132.47, 132.42, 131.36, 129.67, 128.89, 128.69, 128.63, 128.08, 127.56, 126.66, 126.07, 21.03; HR-ESI-TOF-MS ( $m/z$ ):  $[\text{M}]^{2+}$  calcd. for  $\text{C}_{63}\text{H}_{46}\text{D}_6\text{N}_2$ , 421.2248; found, 421.2252.

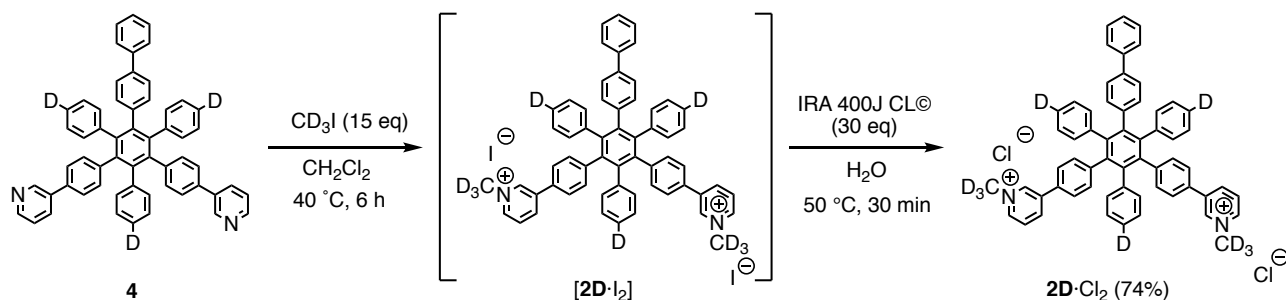

#### 2D-Cl<sub>2</sub> GSA

$\text{CD}_3\text{I}$  (30 mg, 0.20 mmol) was added to a solution of compound **4** (10 mg, 0.013 mmol) in  $\text{CH}_2\text{Cl}_2$  (1 mL). The reaction mixture was stirred at  $40^\circ\text{C}$  for overnight under dark. Then the solvent was removed in vacuo. The crude material was washed with *n*-hexane, diethyl ether and  $\text{CHCl}_3$  two times, respectively to obtain **2D-I<sub>2</sub>** (10 mg, 0.010 mmol) as a yellow solid. A suspension of **2D-I<sub>2</sub>** (10 mg, 0.010 mmol) and IRA 400J CL© (150 mg, 0.30 mmol) in water (2 mL) were stirred for 30 h at  $50^\circ\text{C}$ . Then the solution was filtered and the filtrate was concentrated in vacuo to obtain **2D-Cl<sub>2</sub>** (8 mg, 0.010 mmol) as a pale yellow solid in 74% yield in two steps.  $^1\text{H}$  NMR (500 MHz,  $\text{CD}_3\text{OD}$ ,  $25^\circ\text{C}$ ):  $\delta$  9.09 (s, 2H), 8.75 (d,  $J = 5.8$  Hz, 2H), 8.63 (d,  $J = 8.4$  Hz, 2H), 8.01 (dd,  $J = 8.2, 6.0$  Hz, 2H), 7.44–7.36 (m, 6H), 7.32 (t,  $J = 7.5$  Hz, 2H), 7.23 (t,  $J = 7.3$  Hz, 1H), 7.18 (d,  $J = 8.6$  Hz, 4H), 7.13 (d,  $J = 8.5$  Hz, 2H), 7.02–6.94 (m, 8H), 6.90–6.85 (m, 6H);  $^{13}\text{C}$  NMR (125 MHz,  $\text{CD}_3\text{OD}$ , 298 K):  $\delta$  144.65, 144.61, 144.33, 143.32, 142.32, 141.99, 141.93, 141.76, 141.57, 141.53, 141.49, 140.81, 140.61, 139.37, 134.06, 133.00, 132.58, 132.54, 131.54, 129.67, 128.91, 128.12, 127.93, 127.88, 127.57, 126.74, 126.15. HR-ESI-TOF-MS ( $m/z$ ):  $[\text{M}]^{2+}$  calcd. for  $\text{C}_{60}\text{H}_{37}\text{D}_9\text{N}_2$ , 401.7107; found, 401.7090.

## The effect of guest molecules on the scrambling of GSAs between nanocubes

Scrambling experiment between  $\text{TBM}_2@1_6$  and  $2_6$ : Solutions of  $\text{TBM}_2@1_6$  and of  $2_6$  ([GSA] = 2 mM) in  $\text{D}_2\text{O}$  were prepared separately. A solution of TMACl (8 mM, TMACl indicates tetramethylammonium chloride) in  $\text{D}_2\text{O}$  (15  $\mu\text{L}$ ), which was used as an internal standard, was added to an NMR tube. Then the solutions of  $\text{TBM}_2@1_6$  (150  $\mu\text{L}$ ) and of  $2_6$  (150  $\mu\text{L}$ ) and  $\text{D}_2\text{O}$  (285  $\mu\text{L}$ ) were added to the NMR tube to adjust the concentration of GSAs to 0.5 mM. The scrambling of the GSAs was monitored at 25  $^\circ\text{C}$  by  $^1\text{H}$  NMR spectroscopy (Supplementary Figure 7).

Scrambling experiment between  $1_6$  and  $\text{TBM}_2@2_6$ : Solutions of  $1_6$  and of  $\text{TBM}_2@2_6$  ([GSA] = 2 mM) in  $\text{D}_2\text{O}$  were prepared separately. A solution of TMACl (8 mM, TMACl indicates tetramethylammonium chloride) in  $\text{D}_2\text{O}$  (15  $\mu\text{L}$ ), which was used as an internal standard, was added to an NMR tube. Then the solutions of  $1_6$  (150  $\mu\text{L}$ ) and of  $\text{TBM}_2@2_6$  (150  $\mu\text{L}$ ) and  $\text{D}_2\text{O}$  (285  $\mu\text{L}$ ) were added to the NMR tube to adjust the concentration of GSAs to 0.5 mM. The scrambling of the GSAs was monitored at 25  $^\circ\text{C}$  by  $^1\text{H}$  NMR spectroscopy (Supplementary Figure 8).

Scrambling experiment between  $1_6$  and  $\text{TBM}_2@2_6$  with the presence of insoluble TBM: Solutions of  $1_6$  and of  $\text{TBM}_2@2_6$  ([GSA] = 2 mM) in  $\text{D}_2\text{O}$  were prepared separately. A solution of TMACl (8 mM) in  $\text{D}_2\text{O}$  (15  $\mu\text{L}$ ), which was used as an internal standard, was added to an NMR tube. Then the solutions of  $1_6$  (150  $\mu\text{L}$ ) and of  $\text{TBM}_2@2_6$  (150  $\mu\text{L}$ ) and  $\text{D}_2\text{O}$  (285  $\mu\text{L}$ ) were added to the NMR tube to adjust the concentration of GSAs to 0.5 mM. About 1 mg of TBM was added to the prepared NMR tube. The scrambling of the GSAs was monitored at 25  $^\circ\text{C}$  by  $^1\text{H}$  NMR spectroscopy (Supplementary Figure 9).

Scrambling experiment between  $\text{TBM}_2@1_6$  and  $2_6$  with the presence of insoluble TBM: Solutions of  $\text{TBM}_2@1_6$  and of  $2_6$  ([GSA] = 2 mM) in  $\text{D}_2\text{O}$  were prepared separately. A solution of TMACl (8 mM) in  $\text{D}_2\text{O}$  (15  $\mu\text{L}$ ), which was used as an internal standard, was added to an NMR tube. Then the solutions of  $\text{TBM}_2@1_6$  (150  $\mu\text{L}$ ) and of  $2_6$  (150  $\mu\text{L}$ ) and  $\text{D}_2\text{O}$  (285  $\mu\text{L}$ ) were added to the NMR tube to adjust the concentration of GSAs to 0.5 mM. About 1 mg of TBM was added to the prepared NMR tube. The scrambling of the GSAs was monitored at 25  $^\circ\text{C}$  by  $^1\text{H}$  NMR spectroscopy (Supplementary Figure 10).

Scrambling experiment between  $\text{PCCP}_2@1_6$  and  $2_6$ : Solutions of  $\text{PCCP}_2@1_6$  and of  $2_6$  ([GSA] = 2 mM) in  $\text{D}_2\text{O}$  were prepared separately. A solution of TMACl (8 mM) in  $\text{D}_2\text{O}$  (15  $\mu\text{L}$ ), which was used as an internal standard, was added to an NMR tube. Then the solutions of  $\text{PCCP}_2@1_6$  (150  $\mu\text{L}$ ) and of  $2_6$  (150  $\mu\text{L}$ ) and  $\text{D}_2\text{O}$  (285  $\mu\text{L}$ ) were added to the NMR tube to adjust the concentration of GSAs to 0.5 mM. The scrambling of the GSAs was monitored at 25  $^\circ\text{C}$  by  $^1\text{H}$  NMR spectroscopy (Supplementary Figure 11).

Scrambling experiment between  $\text{PCCP}_2@1_6$  and  $\text{PCCP}_2@2_6$ : The solutions of  $\text{PCCP}_2@1_6$  and of  $\text{PCCP}_2@2_6$  ([GSA] = 2 mM) in  $\text{D}_2\text{O}$  were prepared separately. A solution of TMACl (8 mM) in  $\text{D}_2\text{O}$  (15  $\mu\text{L}$ ), which was used as an internal standard, was added to an NMR tube. Then the solutions of  $\text{PCCP}_2@1_6$  (150  $\mu\text{L}$ ) and of  $\text{PCCP}_2@2_6$  (150  $\mu\text{L}$ ) and  $\text{D}_2\text{O}$  (285  $\mu\text{L}$ ) were added to the NMR tube to adjust the concentration of GSAs to 0.5 mM. The scrambling of the GSAs was monitored at 25  $^\circ\text{C}$  by  $^1\text{H}$  NMR spectroscopy (Supplementary Figure 12).

Scrambling experiment between  $1_6$  and  $2_6$  in the presence of 2 eq of PCCP: Solutions of  $1_6$  and of  $2_6$  ([GSA] = 2 mM) in  $\text{D}_2\text{O}$  were prepared separately. A solution of TMACl (8 mM) in  $\text{D}_2\text{O}$  (15  $\mu\text{L}$ ), which was used as an internal standard was added to an Eppendorf microcentrifuge tube. Then the solutions of  $1_6$  (150  $\mu\text{L}$ ) and of  $2_6$  (150  $\mu\text{L}$ ) and  $\text{D}_2\text{O}$  (275  $\mu\text{L}$ ) were added to the Eppendorf microcentrifuge tube. A solution of NaPCCP (10 mM, 10  $\mu\text{L}$ ) was added and the tube

was shaken for 30 s to complete the encapsulation. The scrambling of the GSAs was monitored at 25 °C by  $^1\text{H}$  NMR spectroscopy (Supplementary Figure 13).

Scrambling experiment between  $\mathbf{1}_6$  and  $\text{PCCP}_2@2_6$ : The solutions of  $\mathbf{1}_6$  and of  $\text{PCCP}_2@2_6$  ( $[\text{GSA}] = 2 \text{ mM}$ ) in  $\text{D}_2\text{O}$  were prepared separately. A solution of TMACl (8 mM) in  $\text{D}_2\text{O}$  (15  $\mu\text{L}$ ), which was used as an internal standard, was added to an Eppendorf microcentrifuge tube. Then the solutions of  $\mathbf{1}_6$  (150  $\mu\text{L}$ ) and of  $\text{PCCP}_2@2_6$  (150  $\mu\text{L}$ ) and  $\text{D}_2\text{O}$  (285  $\mu\text{L}$ ) were added to the Eppendorf microcentrifuge tube to adjust the concentration of GSAs to 0.5 mM. The scrambling of the GSAs was monitored at 25 °C by  $^1\text{H}$  NMR spectroscopy (Supplementary Figure 14).

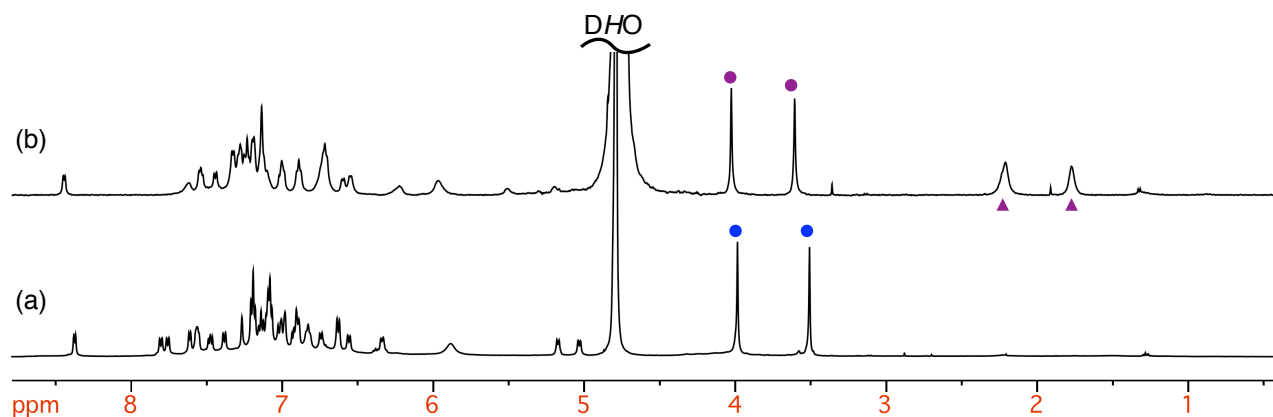

**Supplementary Figure 1** |  $^1\text{H}$  NMR spectra of the host-guest complexes between  $\mathbf{2}_6$  and *n*-hexane (500 MHz, 25 °C,  $\text{D}_2\text{O}$ ,  $[\mathbf{2}] = 1.0 \text{ mM}$ ). (a)  $\mathbf{2}_6$ . (b)  $\text{Hex}_2@2_6$ . Hex indicates *n*-hexane. Blue and violet solid circles indicate the signals of the *N*-methyl signals of  $\mathbf{2}_6$  and  $\text{Hex}_2@2_6$ , respectively. Violet solid triangle indicates the encapsulated Hex.

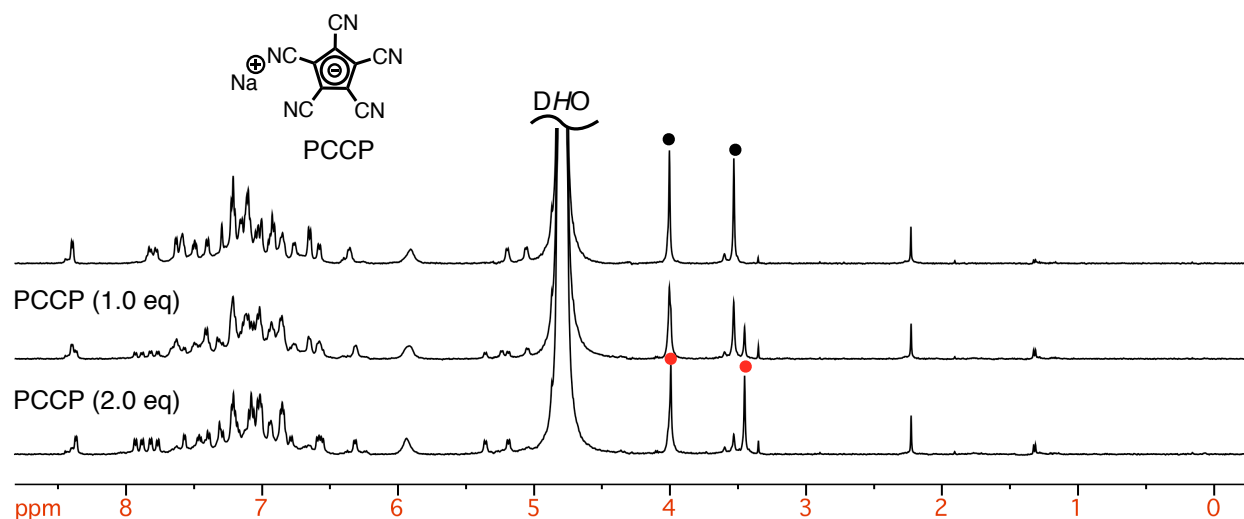

**Supplementary Figure 2** |  $^1\text{H}$  NMR titration experiments of PCCP against  $\mathbf{2}_6$  (500 MHz, 25 °C,  $\text{D}_2\text{O}$ ,  $[\mathbf{2}] = 1.0 \text{ mM}$ , PCCP indicates pentacyanocyclopentadienide). Red and black solid circles indicate the signals of the *p*-tolyl methyl signals of  $\text{PCCP}_2@2_6$  and  $\mathbf{2}_6$ , respectively.



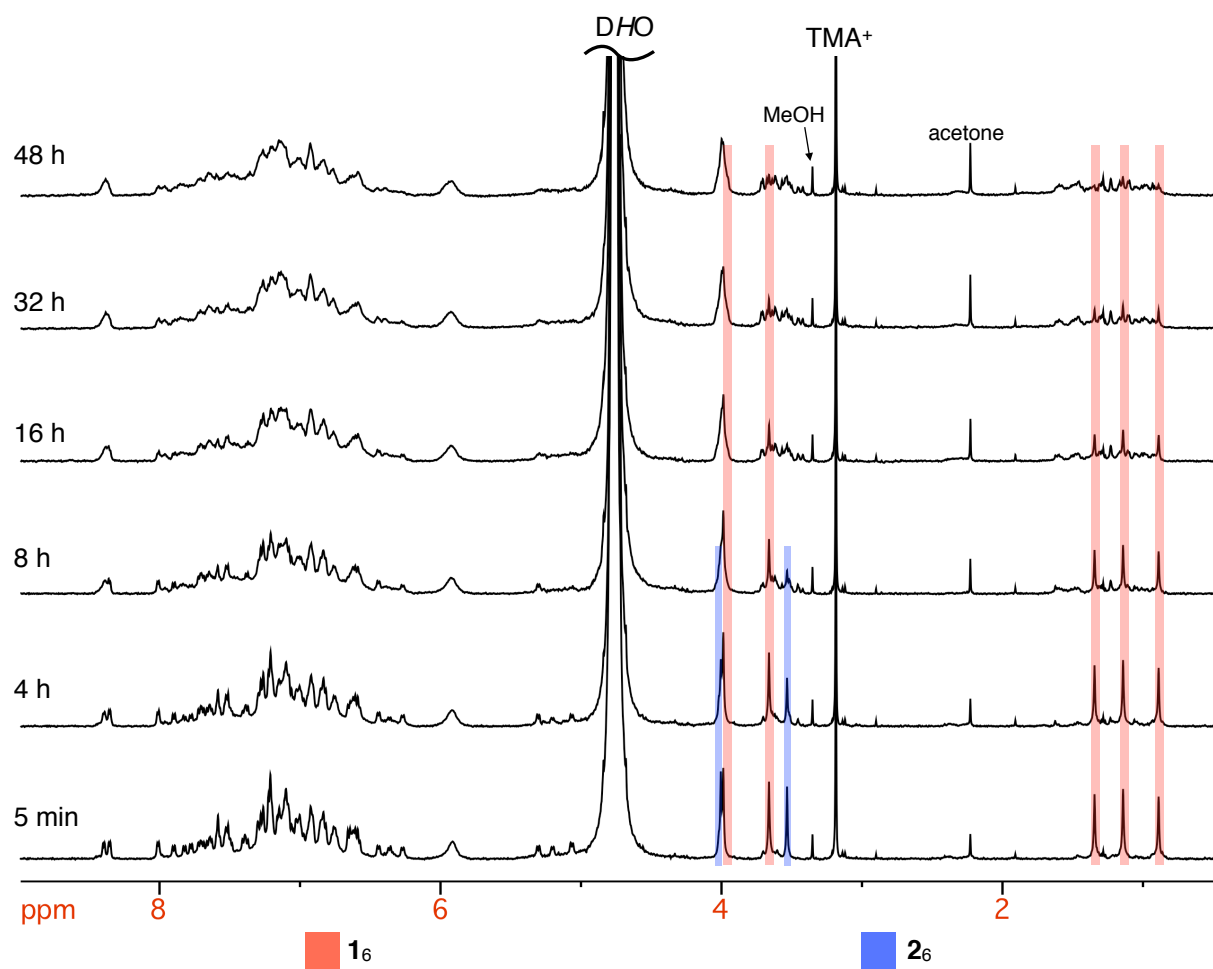

**Supplementary Figure 3** | <sup>1</sup>H NMR spectra of the scrambling experiment between 1<sub>6</sub> and 2<sub>6</sub> (500 MHz, 25 °C, D<sub>2</sub>O, [1] = [2] = 0.4 mM). TMA<sup>+</sup> indicates tetramethylammonium used as an internal standard.

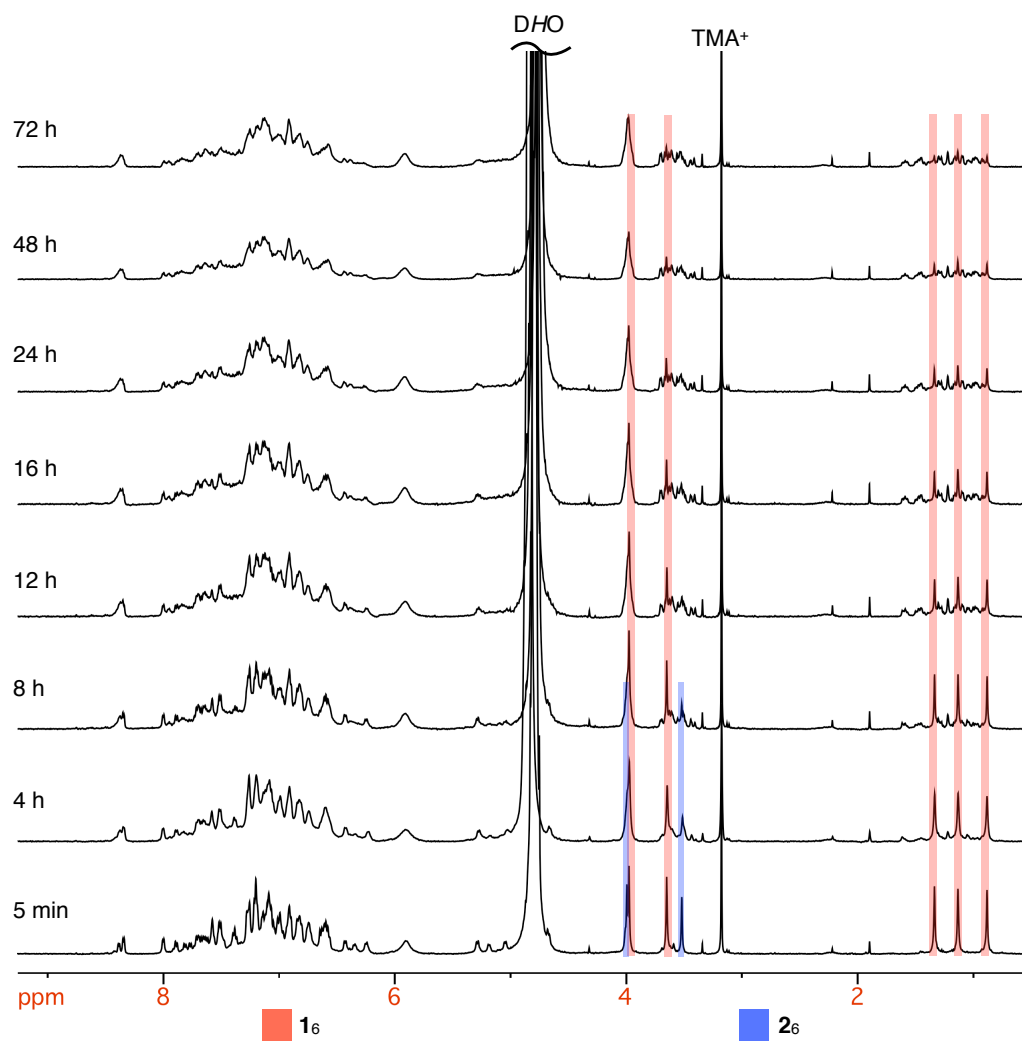

**Supplementary Figure 4** |  $^1\text{H}$  NMR spectra of the scrambling experiment between  $1_6$  and  $2_6$  (500 MHz, 25 °C,  $\text{D}_2\text{O}$ ,  $[1] = [2] = 0.5$  mM).  $\text{TMA}^+$  indicates tetramethylammonium used as an internal standard.

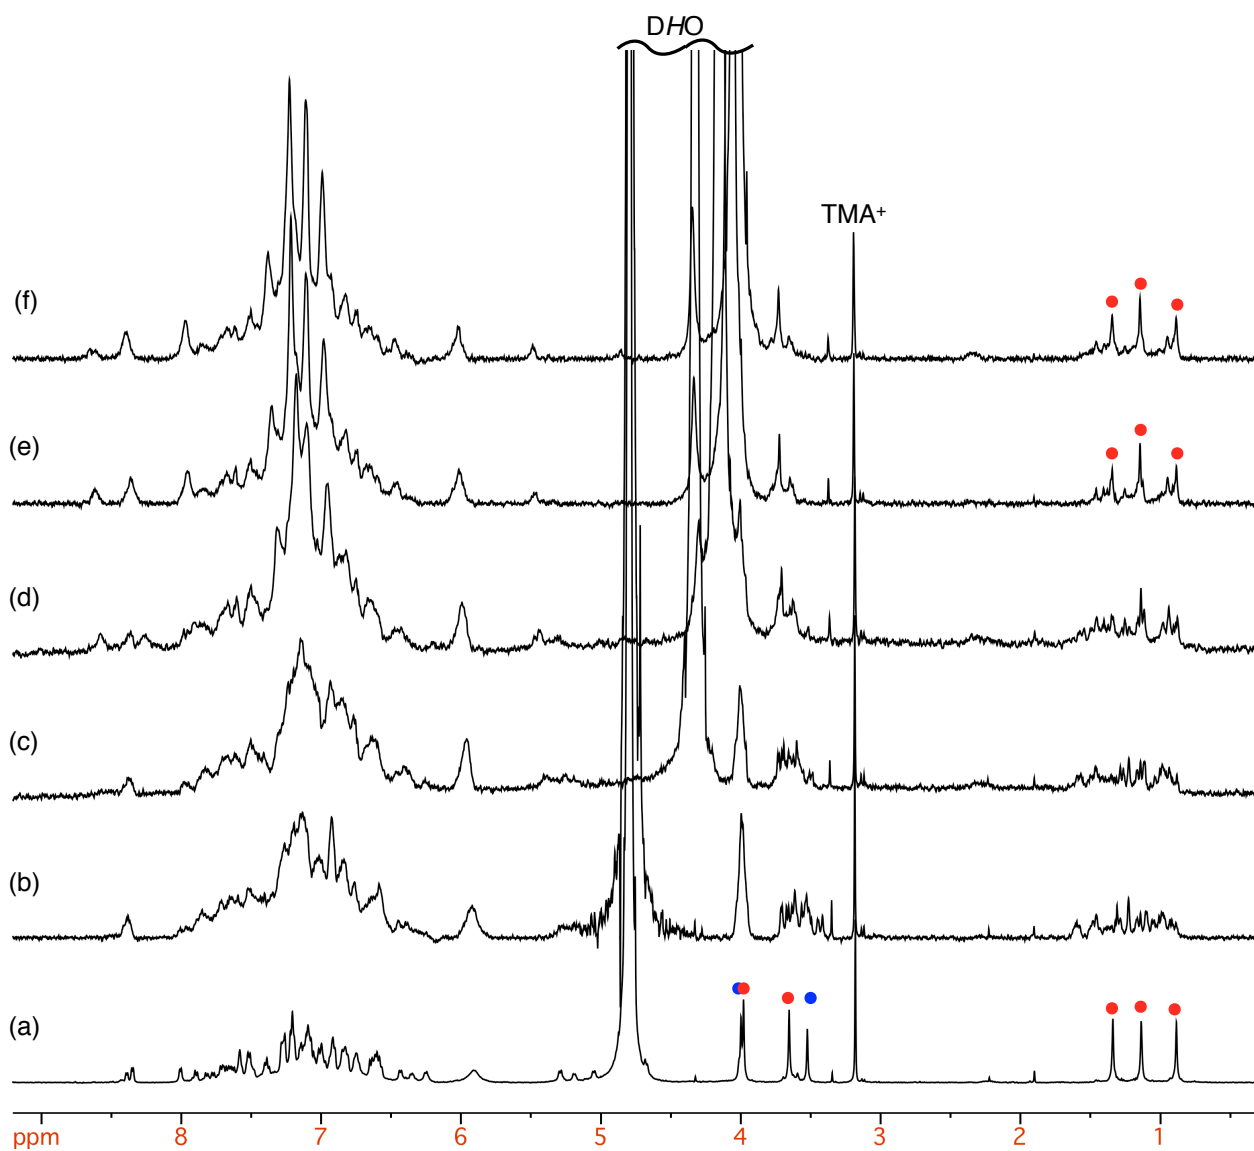

**Supplementary Figure 5** | <sup>1</sup>H NMR monitor of the induced-sorting of **1**<sub>6</sub> upon heating (500 MHz, D<sub>2</sub>O, [**1**] = [**2**] = 0.5 mM). (a) A mixture of **1**<sub>6</sub> and **2**<sub>6</sub> at 25 °C measured right after the mixing of **1**<sub>6</sub> and **2**<sub>6</sub>. (b) An almost statistical mixture of **1**<sub>x</sub>**2**<sub>6-x</sub> ( $x = 0 - 6$ ) at 25 °C (after the convergence). (c) heated at 70 °C. (d) heated at 90 °C. (e) heated at 95 °C. (f) heated at 100 °C. Red and blue solid circles indicate the signals of **1**<sub>6</sub> and **2**<sub>6</sub>, respectively. TMA<sup>+</sup> indicates tetramethylammonium used as an internal standard.

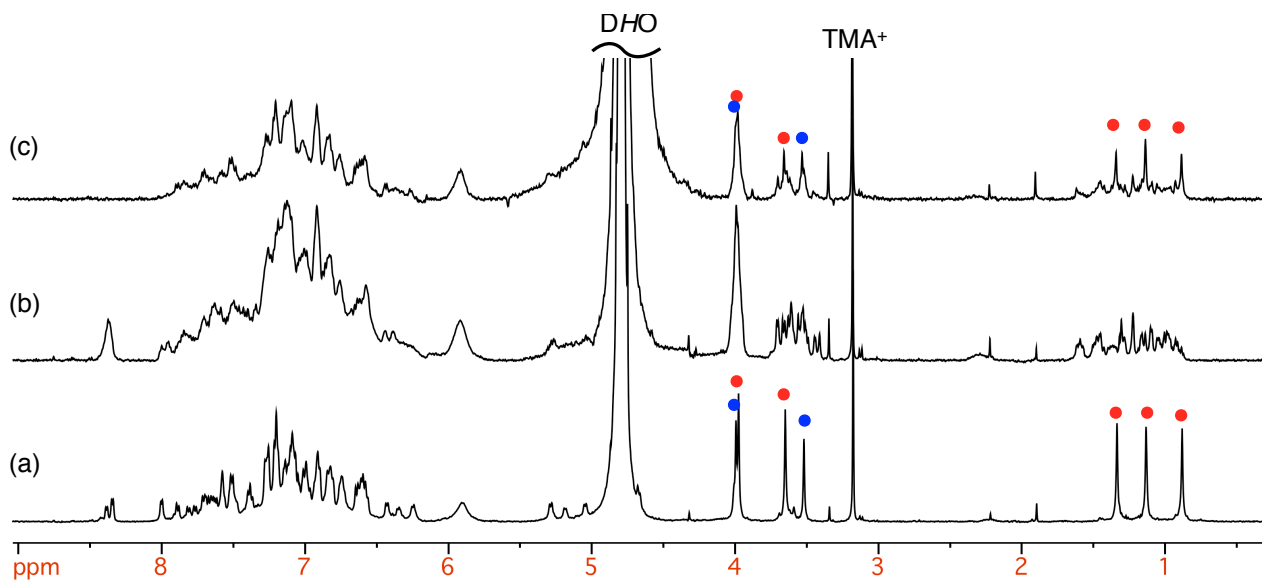

**Supplementary Figure 6** |  $^1\text{H}$  NMR monitor of one cycle of the transitions between the ordered and disordered states by changing temperature (500 MHz, 25 °C,  $\text{D}_2\text{O}$ ,  $[\mathbf{1}] = [\mathbf{2}] = 0.5$  mM). (a) A mixture of  $\mathbf{1}_6$  and  $\mathbf{2}_6$  measured right after the mixing  $\mathbf{1}_6$  and  $\mathbf{2}_6$ . (b) An almost statistical mixture of  $\mathbf{1}_x\mathbf{2}_{6-x}$  ( $x = 0 - 6$ ) after the convergence. (c) A mixture of  $\mathbf{1}_6$  and  $\mathbf{2}_6$  was preferentially produced by heating at 100 °C followed by rapid cooling at 0 °C. Red and blue solid circles indicate the signals of  $\mathbf{1}_6$  and  $\mathbf{2}_6$ , respectively.  $\text{TMA}^+$  indicates tetramethylammonium used as an internal standard.

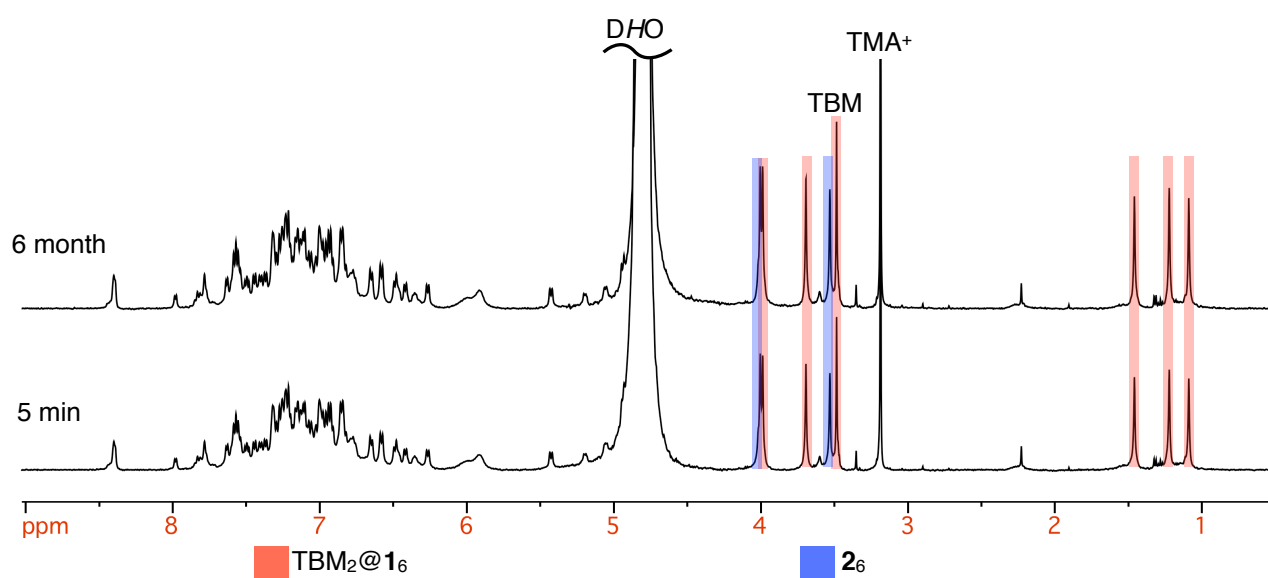

**Supplementary Figure 7** |  $^1\text{H}$  NMR spectra of the scrambling experiment between  $\text{TBM}_2@1_6$  and  $\mathbf{2}_6$  (500 MHz, 25 °C,  $\text{D}_2\text{O}$ ,  $[\mathbf{1}] = [\mathbf{2}] = 0.5$  mM).  $\text{TMA}^+$  indicates tetramethylammonium used as an internal standard.

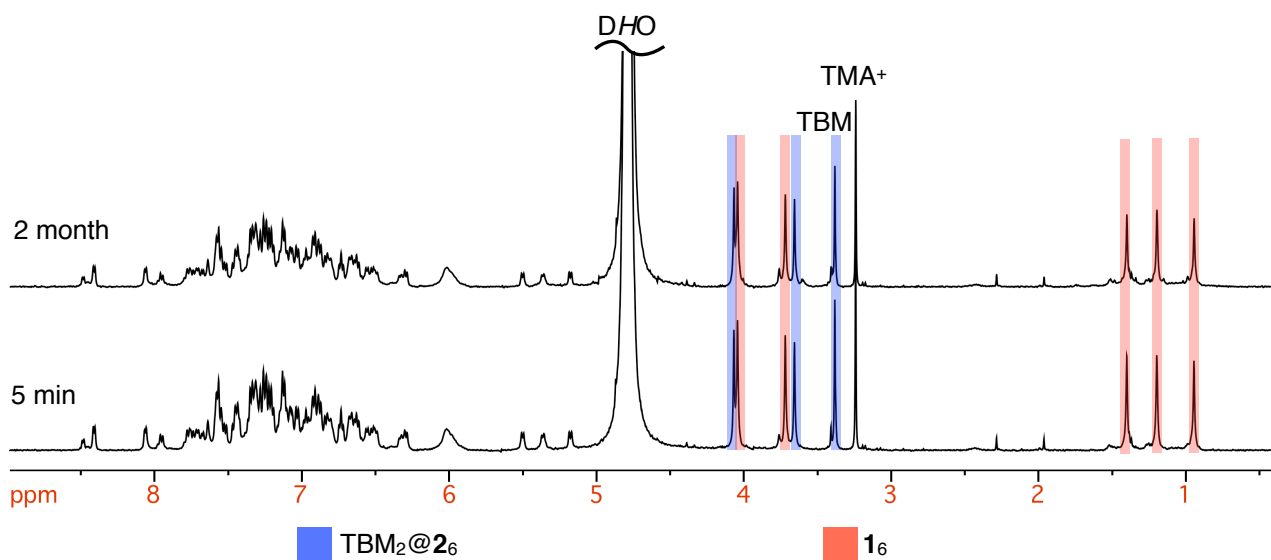

**Supplementary Figure 8** | <sup>1</sup>H NMR spectra of the scrambling experiment between **1**<sub>6</sub> and TBM<sub>2</sub>@**2**<sub>6</sub> (500 MHz, 25 °C, D<sub>2</sub>O, [1] = [2] = 0.5 mM). TMA<sup>+</sup> indicates tetramethylammonium used as an internal standard.

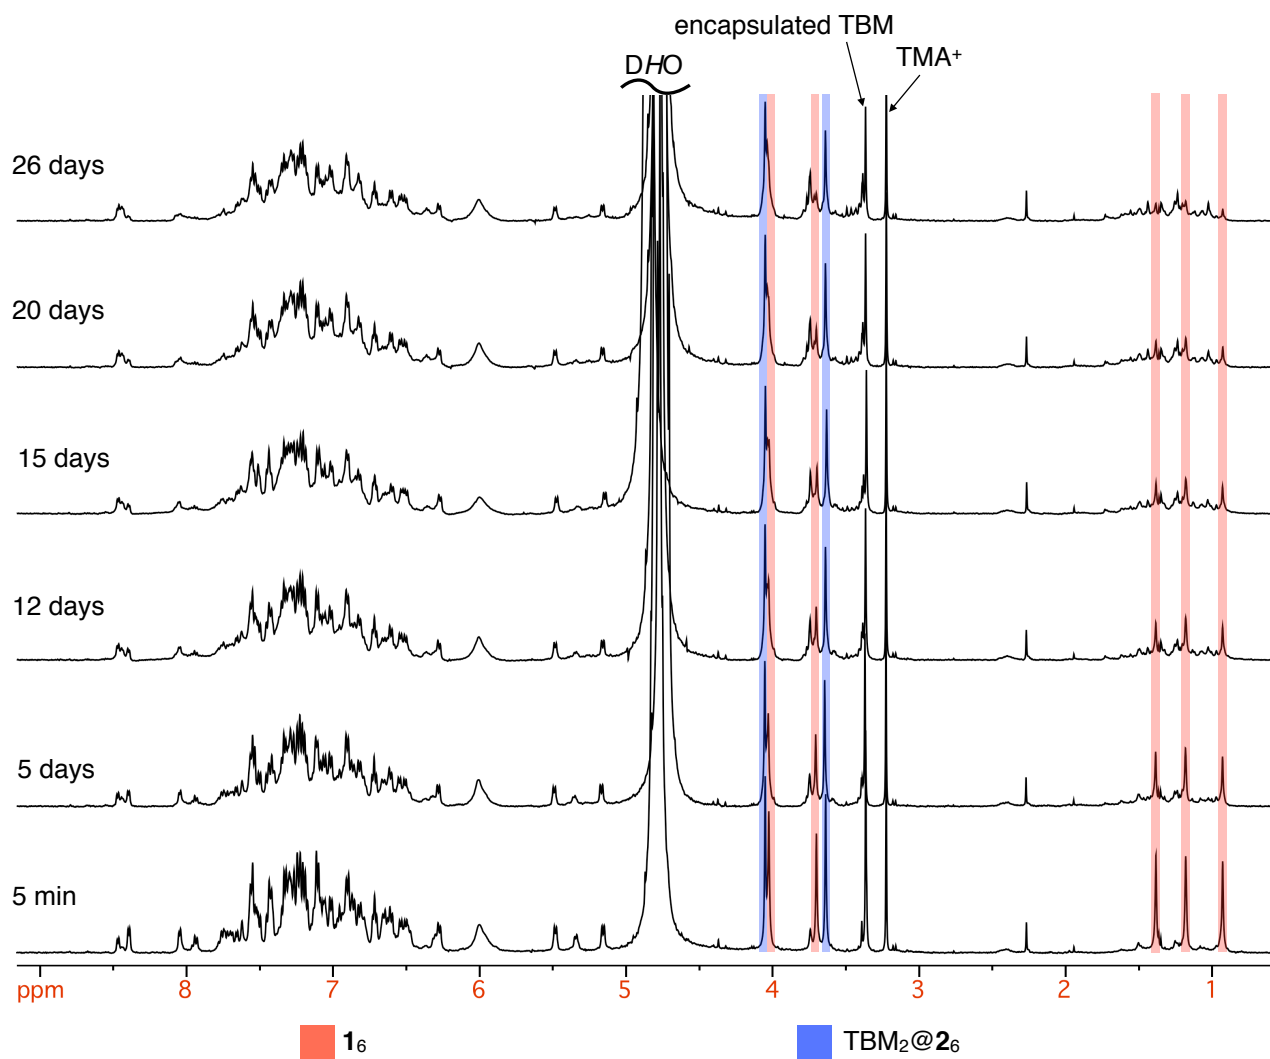

**Supplementary Figure 9** |  $^1\text{H}$  NMR spectra of the scrambling experiment between  $\mathbf{1}_6$  and  $\text{TBM}_2@2_6$  in the presence of insoluble TBM in  $\text{D}_2\text{O}$  (500 MHz, 25 °C,  $\text{D}_2\text{O}$ ,  $[\mathbf{1}] = [\mathbf{2}] = 0.5$  mM).  $\text{TMA}^+$  indicates tetramethylammonium used as an internal standard.

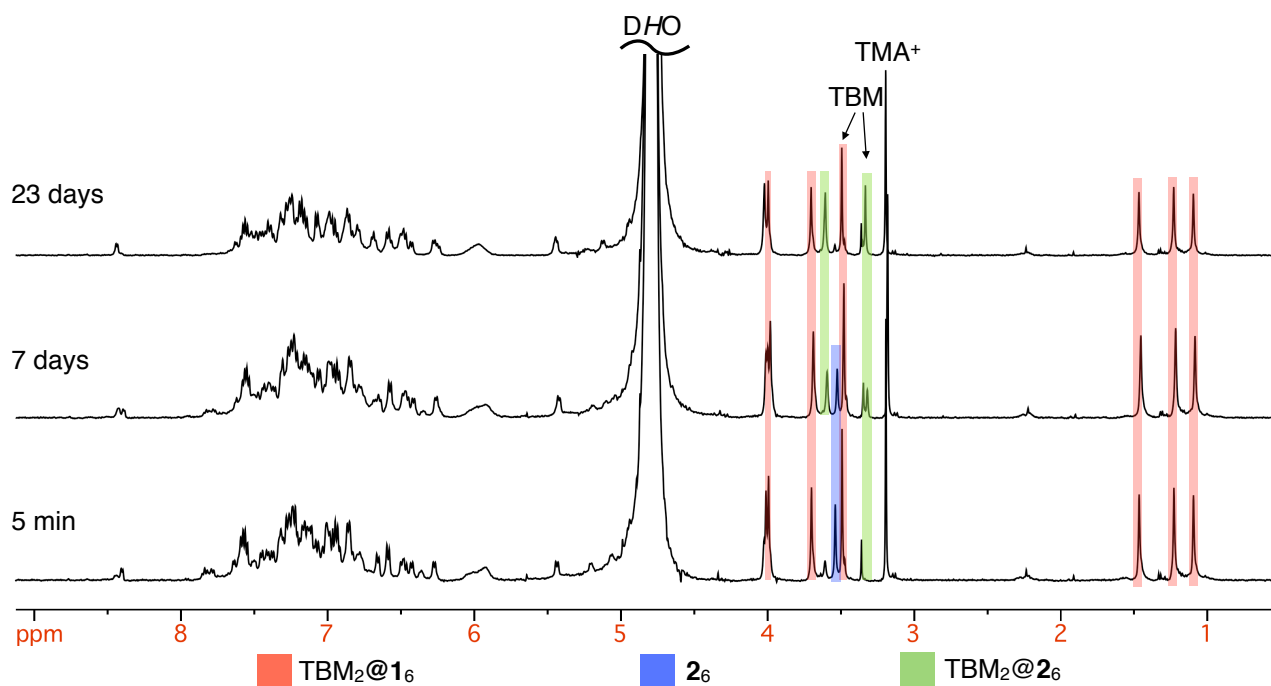

**Supplementary Figure 10** |  $^1\text{H}$  NMR spectra of the scrambling experiment between TBM $_2$ @1 $_6$  and 2 $_6$  in the presence of insoluble TBM in  $\text{D}_2\text{O}$  (500 MHz, 25  $^\circ\text{C}$ ,  $\text{D}_2\text{O}$ , [1] = [2] = 0.5 mM). TMA $^+$  indicates tetramethylammonium used as an internal standard.

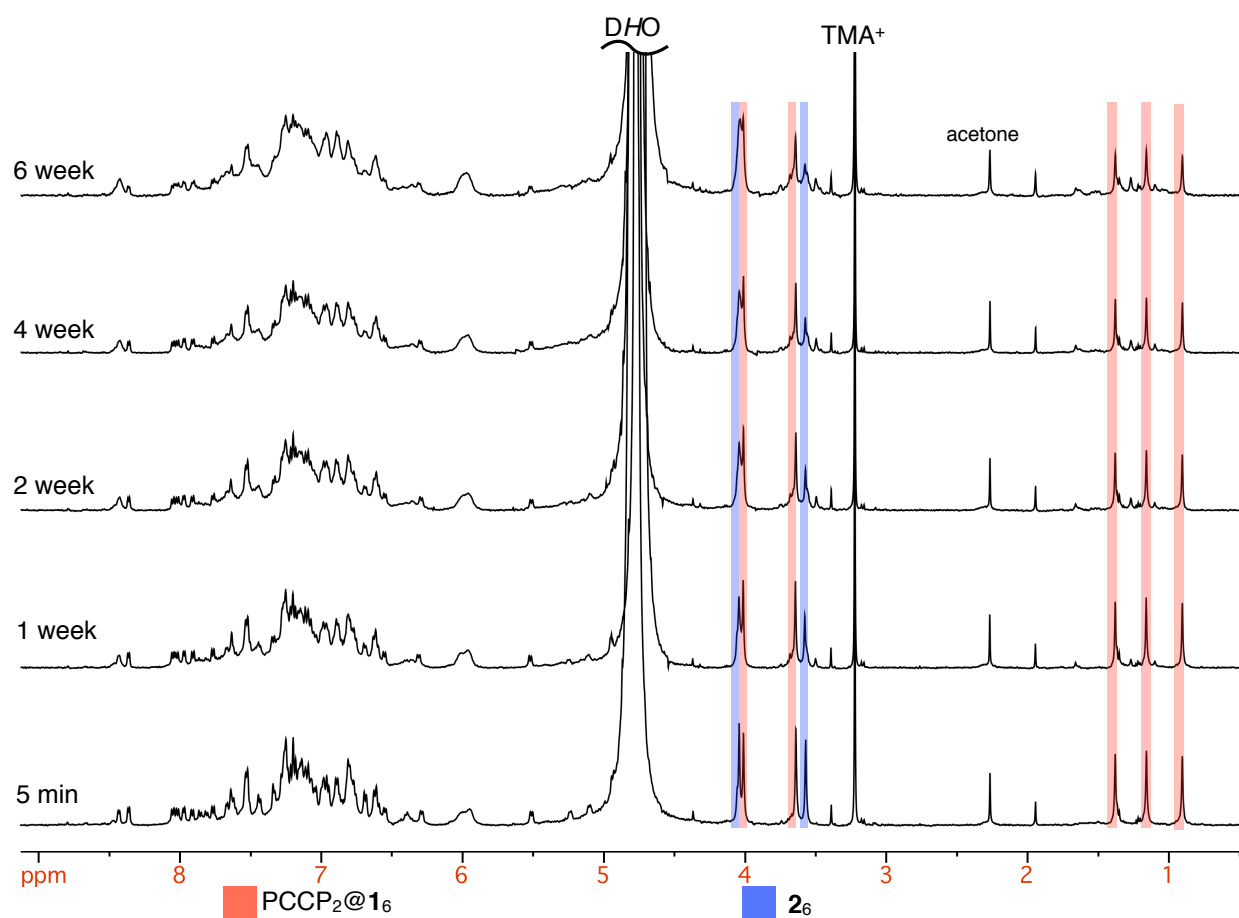

**Supplementary Figure 11** |  $^1\text{H}$  NMR spectra of the scrambling experiment between PCCP $_2$ @1 $_6$  and 2 $_6$  (500 MHz, 25  $^\circ\text{C}$ ,  $\text{D}_2\text{O}$ , [1] = [2] = 0.5 mM). TMA $^+$  indicates tetramethylammonium used as an internal standard.

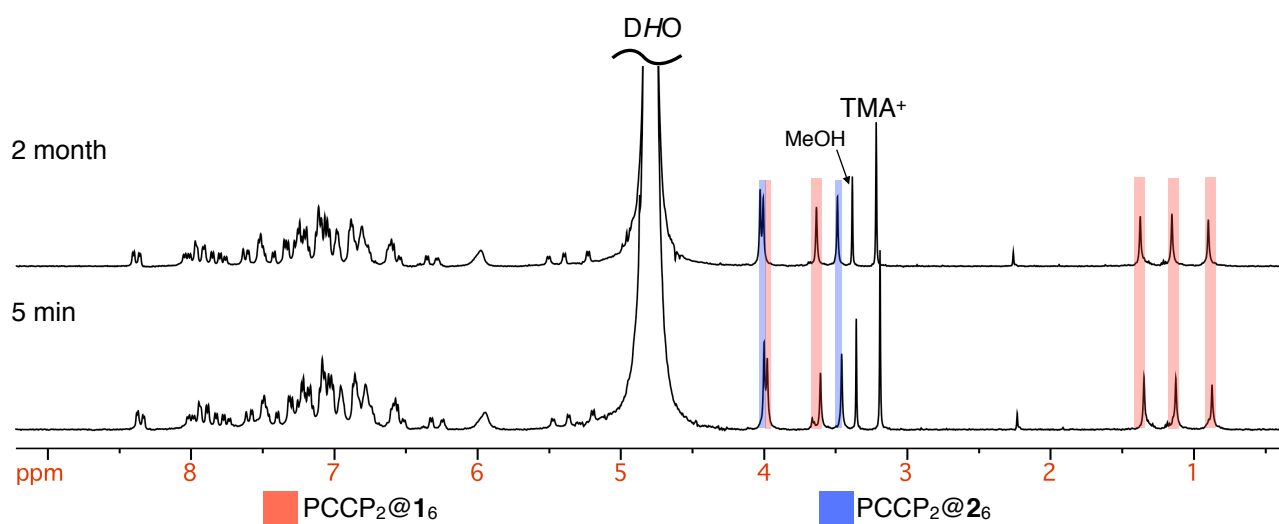

**Supplementary Figure 12** |  $^1\text{H}$  NMR spectra of the scrambling experiment between  $\text{PCCP}_2@1_6$  and  $\text{PCCP}_2@2_6$  (500 MHz, 25 °C,  $\text{D}_2\text{O}$ ,  $[\mathbf{1}] = [\mathbf{2}] = 0.5$  mM).  $\text{TMA}^+$  indicates tetramethylammonium used as an internal standard.

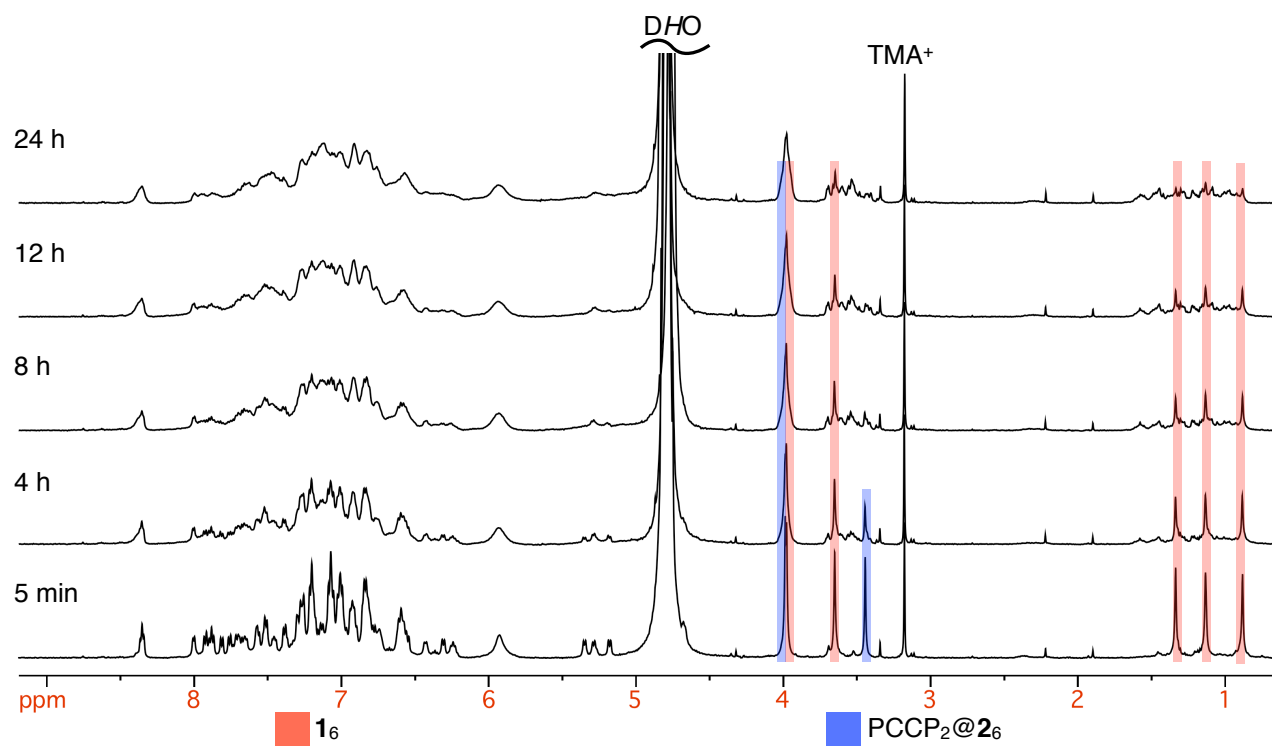

**Supplementary Figure 13** |  $^1\text{H}$  NMR spectra of the scrambling experiment between  $\mathbf{1}_6$  and  $\mathbf{2}_6$  in the presence of 2 eq of PCCP (500 MHz, 25 °C,  $\text{D}_2\text{O}$ ,  $[\mathbf{1}] = [\mathbf{2}] = 0.5$  mM).  $\text{TMA}^+$  indicates tetramethylammonium used as an internal standard.



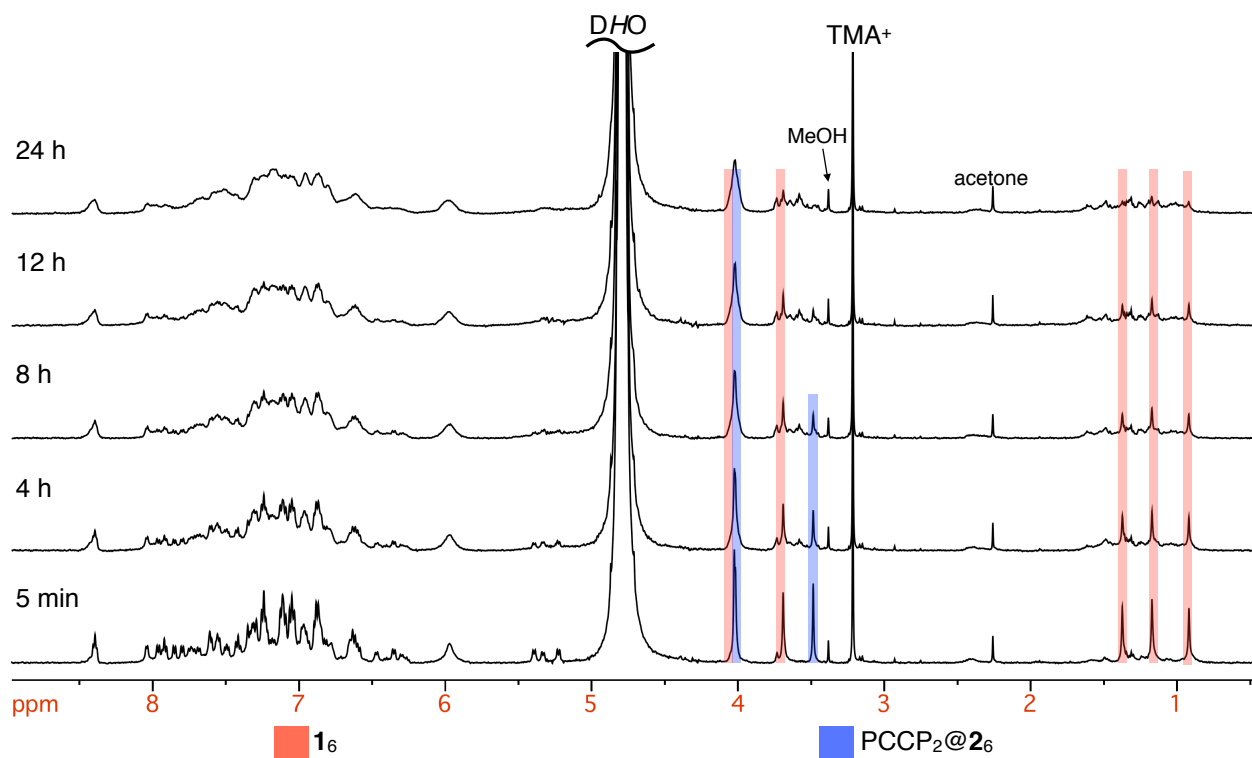

**Supplementary Figure 14** |  $^1\text{H}$  NMR spectra of the scrambling experiment between  $\mathbf{1}_6$  and  $\text{PCCP}_2@2_6$  (500 MHz, 25 °C,  $\text{D}_2\text{O}$ ,  $[\mathbf{1}] = [\mathbf{2}] = 0.5$  mM).  $\text{TMA}^+$  indicates tetramethylammonium used as an internal standard.

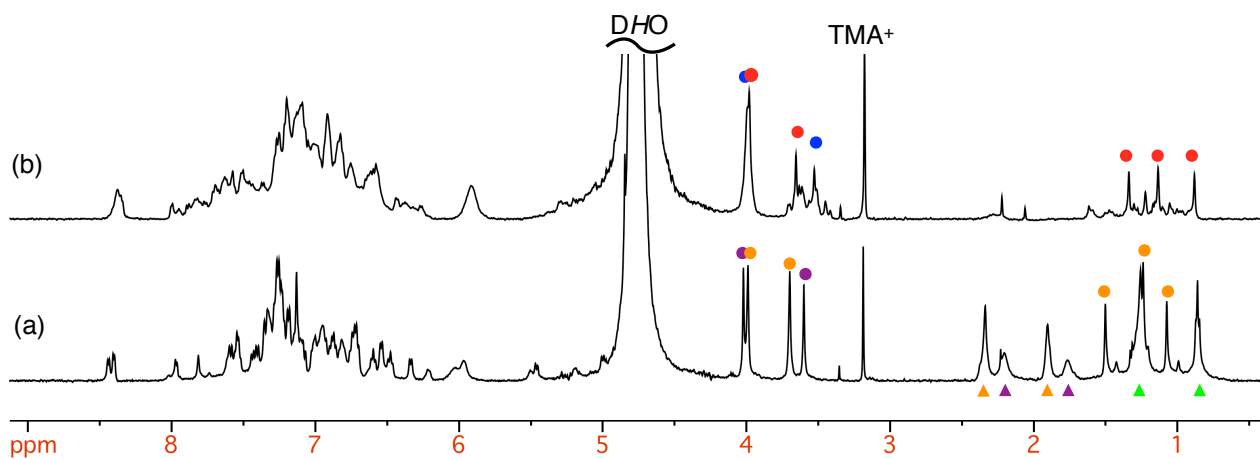

**Supplementary Figure 15** |  $^1\text{H}$  NMR monitoring of kinetic lock and unlock of the induced-sorted state (500 MHz, 25 °C,  $\text{D}_2\text{O}$ ,  $[\mathbf{1}] = [\mathbf{2}] = 0.5$  mM). (a) The locked state: a mixture of  $\text{Hex}_3@1_6$  and  $\text{Hex}_2@2_6$ . Hex indicates  $n$ -hexane. Orange and violet solid circles indicate the signals of  $\text{Hex}_3@1_6$  and  $\text{Hex}_2@2_6$ , respectively. Orange, violet and green solid triangles indicate the signals of Hex encapsulated in  $\mathbf{1}_6$ , Hex encapsulated in  $\mathbf{2}_6$  and the water-soluble free Hex, respectively. (b) The unlocked state: a mixture of  $\mathbf{1}_6$  and  $\mathbf{2}_6$ . The encapsulated Hex was removed upon heating at 100 °C. Red and blue solid circles indicate the signals of  $\mathbf{1}_6$  and  $\mathbf{2}_6$ , respectively.  $\text{TMA}^+$  indicates tetramethylammonium used as an internal standard.

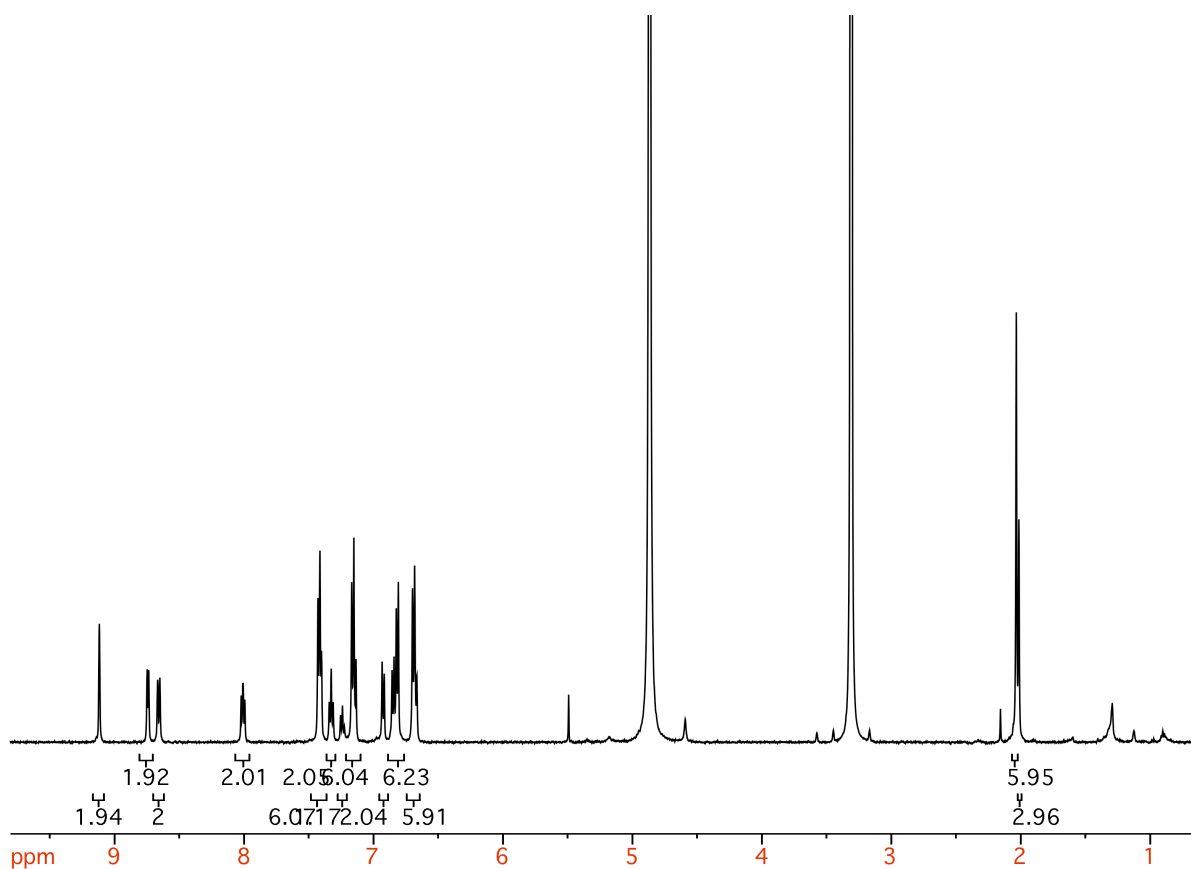

Supplementary Figure 16 | <sup>1</sup>H NMR spectrum (500 MHz, CD<sub>3</sub>OD, 25 °C) of 1D·Cl<sub>2</sub>.

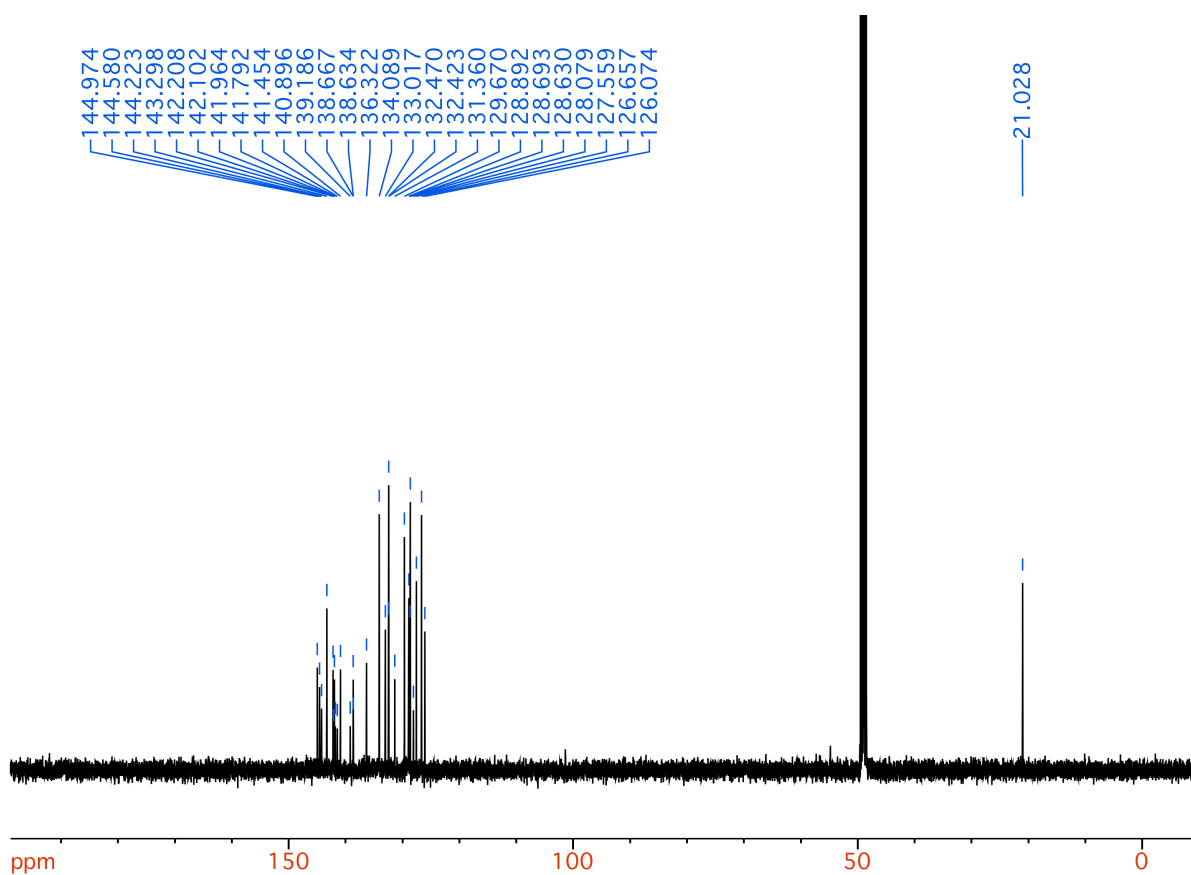

Supplementary Figure 17 | <sup>13</sup>C NMR spectrum (125 MHz, CD<sub>3</sub>OD, 25 °C) of 1D·Cl<sub>2</sub>

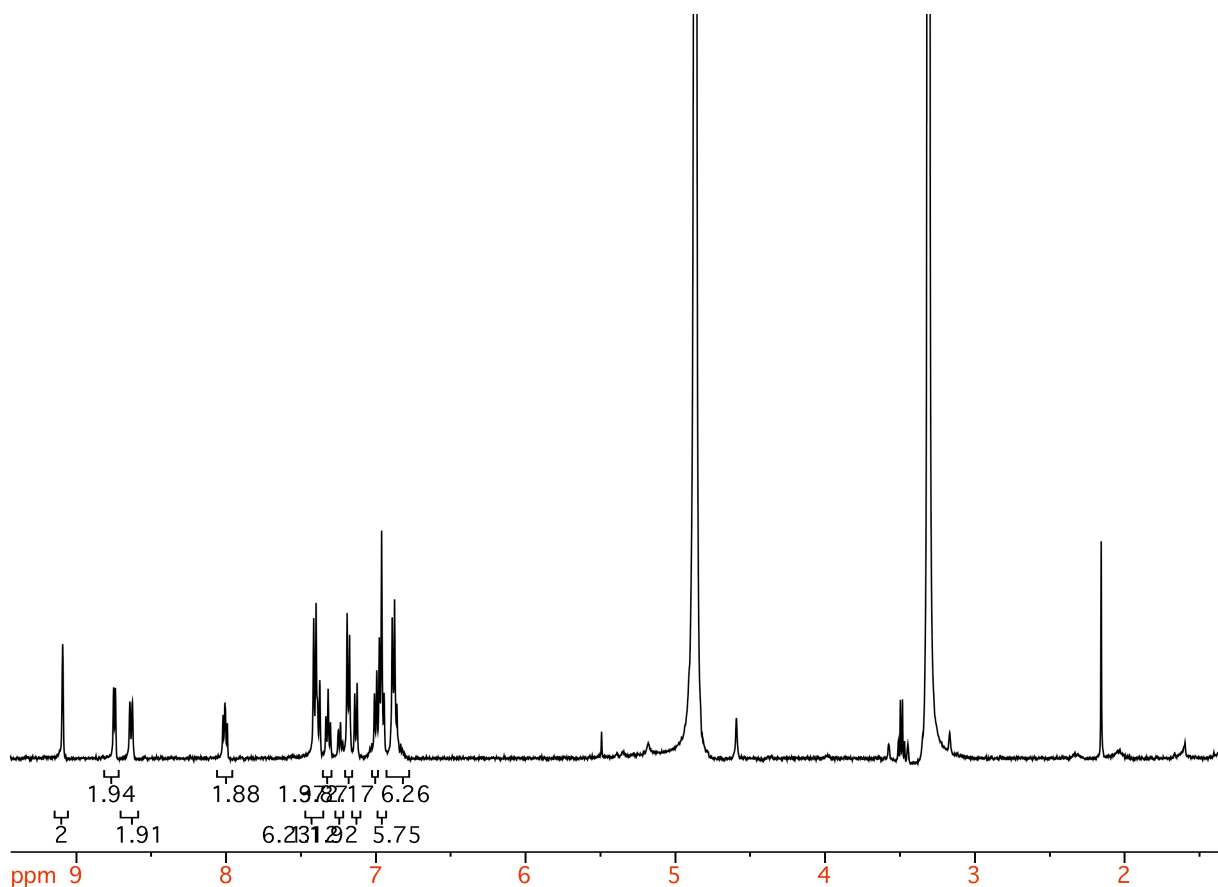

Supplementary Figure 18 |  $^1\text{H}$  NMR spectrum (500 MHz,  $\text{CD}_3\text{OD}$ , 25 °C) of  $2\text{D}\cdot\text{Cl}_2$ .

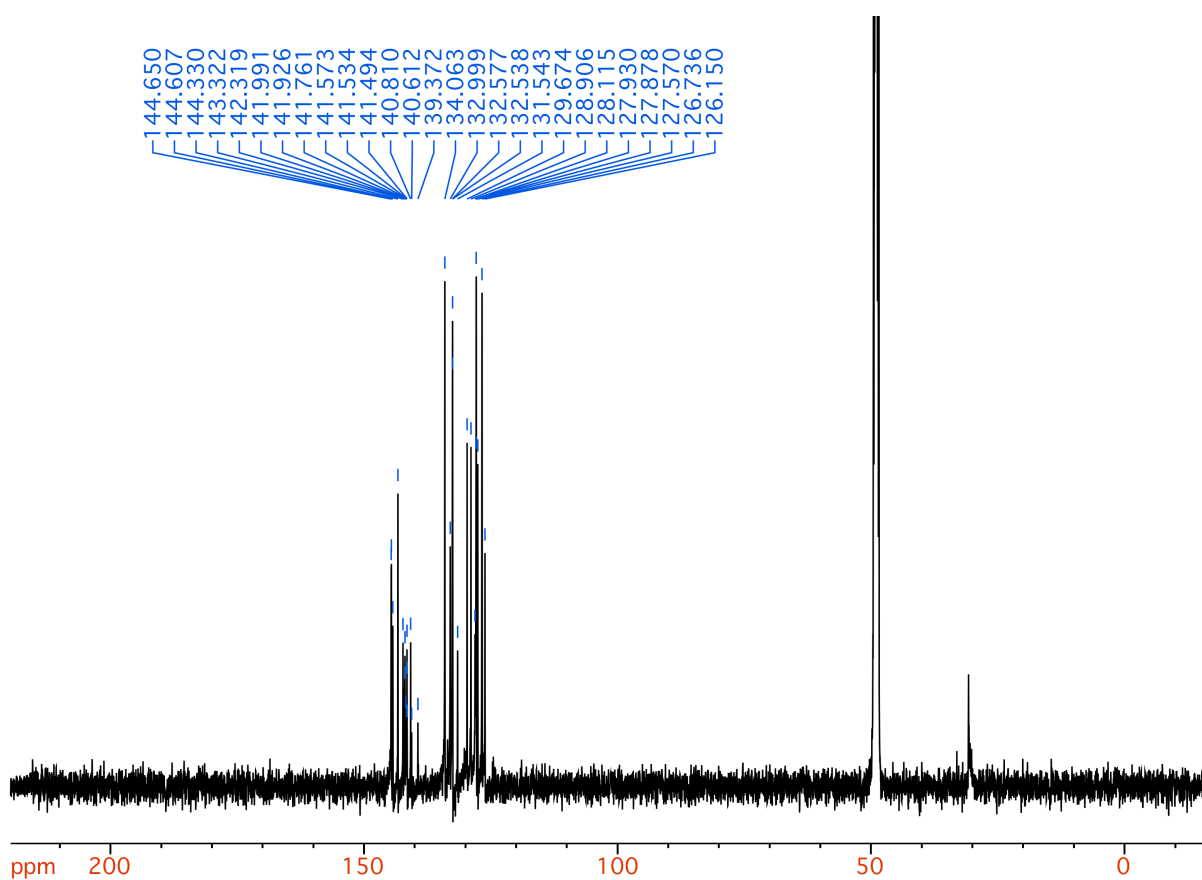

Supplementary Figure 19 |  $^{13}\text{C}$  NMR spectrum (125 MHz,  $\text{CD}_3\text{OD}$ , 25 °C) of  $2\text{D}\cdot\text{Cl}_2$
